# Supplementary material for: Development and application of ultra-sensitive fluorescence spectroscopy and microscopy for biomolecular interaction studies
Source: Royal Society of Chemistry journal article supplement (doi:10.1039/c8sm01221k), 2014-01-01

## Supplementary Information Soft Matter Journal

### Order parameters and time evolution of mesophases in the lyotropic chromonic liquid crystal Sunset Yellow FCF by DNMR

Sergio Diez Berart,<sup>\*a,b</sup> Luana Tortora,<sup>a,c</sup> Daniel Finotello,<sup>d,e</sup> Blaz Zupancic,<sup>a,f</sup> Bostjan Zalar,<sup>f</sup> Lisa Green<sup>a</sup> and Oleg D. Lavrentovich<sup>a</sup>

---

<sup>a</sup> Liquid Crystal Institute and Chemical Physics Interdisciplinary Program, Kent State University, Kent, Ohio 44242, USA.

<sup>b</sup> Grup de les Propietats Físiques dels Materials (GRPFM), Departament de Física, E.T.S.E.I.B. Universitat Politècnica de Catalunya, Diagonal 647, 08028 Barcelona, Spain.

<sup>c</sup> Crystal Diagnostics, Centennial Research Park, 1950 State Route 59, #200, Kent, Ohio 44242, USA.

<sup>d</sup> Division of Materials Research, National Science Foundation, Arlington, VA 22230, USA.

<sup>e</sup> Department of Physics, Kent State University, Kent, Ohio 44242, USA.

<sup>f</sup> Josef Stefan Institute, University of Ljubljana, Jamova cesta 39, SI-1000 Ljubljana, Slovenia.

---

\* E-mail: sergio.diez@upc.edu

#### S1. DNMR pulses information.

Solid echo sequence was used for dS-h system and single pulse for S-d system.

The pulse lengths range from 3 to 10

2000 scans.

For solid echo 1000 ms with 1000 repetition rate

S2. Spectra for the sample of concentration 34% of the dS-h system at three different temperatures.

85 °C (Isotropic phase)

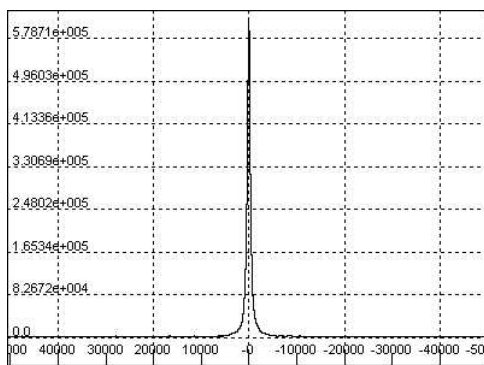

75 °C (Nematic+Isotropic phases)

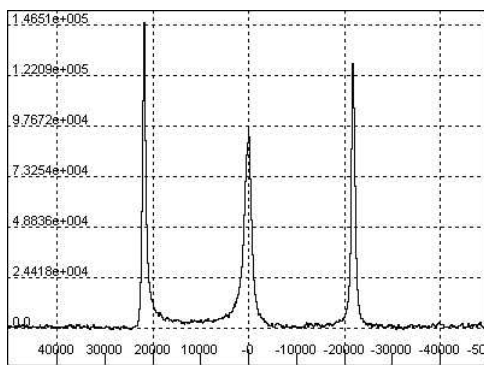

58 °C (Nematic phase)

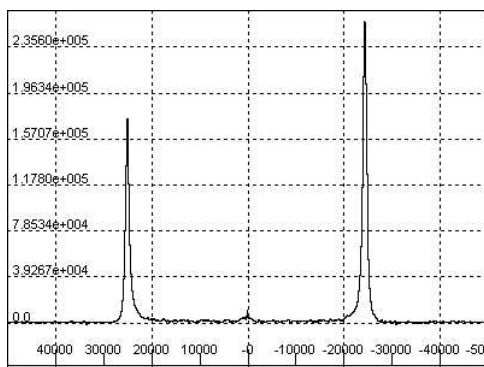

Supplement: c8sm01221k1.pdf [file c8sm01221k1.pdf]
